# Supplementary material for: PLGA-Encapsulated Haemonchus contortus Antigen ES-15 Augments Immune Responses in a Murine Model
Source: MDPI journal article supplement (doi:10.3390/vaccines11121794), 2023-11-30
Supplement: s1 [file s1]

# Supplementary Figure S1:

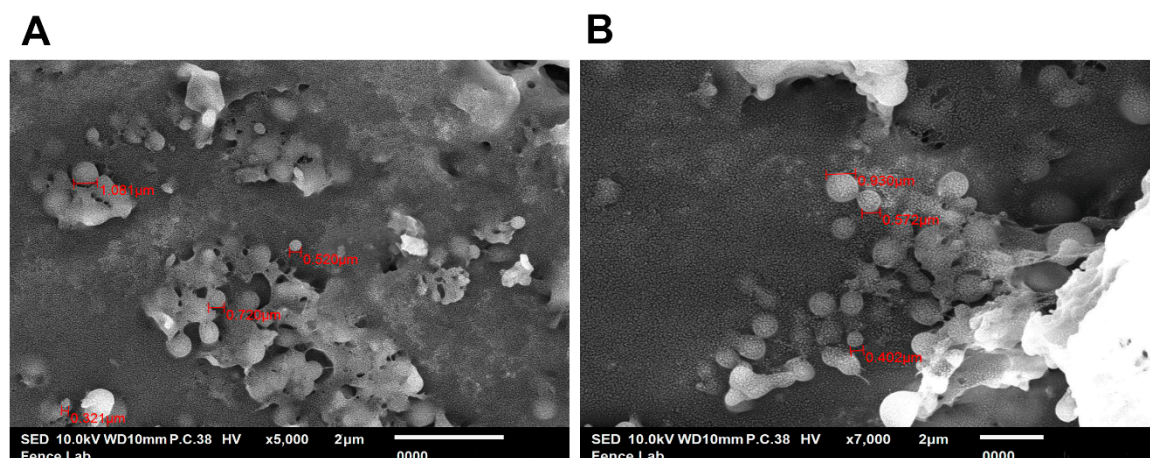

**Figure S1** Scanning electron microscopic images of PLGA NPs at different concentrations of PVA. The scale bar is 2  $\mu$ m.

**Notes:** (A) 1 % PVA. (B) 4 % PVA.

**Abbreviations:** NPs, nanoparticles; PVA, polyvinyl alcohol.

**Supplementary Table S1.** Nature and composition of the different materials injected into ICR mice to evaluate the type of immune response.

| Groups | Inoculations  | Injection<br>at Day 0 | Purpose                                                                        |
|--------|---------------|-----------------------|--------------------------------------------------------------------------------|
| 1      | PBS           | 1                     | Blank control                                                                  |
| 2      | pET-32a       | 1                     | Negative control                                                               |
| 3      | PLGA NPs      | 1                     | To compare PLGA NPs                                                            |
| 4      | rHcES-15      | 1                     | To determine immunogenicity of rHcES-15                                        |
| 5      | rHcES-15+PLGA | 1                     | To determine immunogenicity of rHcES-15 with the adjuvant activity of PLGA NPs |
